# Supplementary material for: Hybrid PDMS/glass microfluidics for high resolution imaging and application to sub-wavelength particle trapping
Source: Royal Society of Chemistry journal article supplement (doi:10.1039/c5lc01536g), 2016-01-01
Supplement: c5lc01536g1.pdf [file c5lc01536g1.pdf]

## Additional content

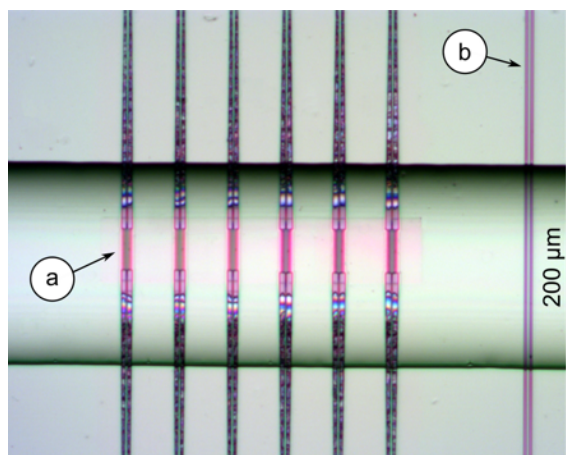

*Additional Fig. 1 Aligned photonic crystals inside the microfluidic channel. The channel is 200 μm wide. a) 6 photonic crystal are visible at the center of the picture, in a red hue. b) ridge waveguide.*

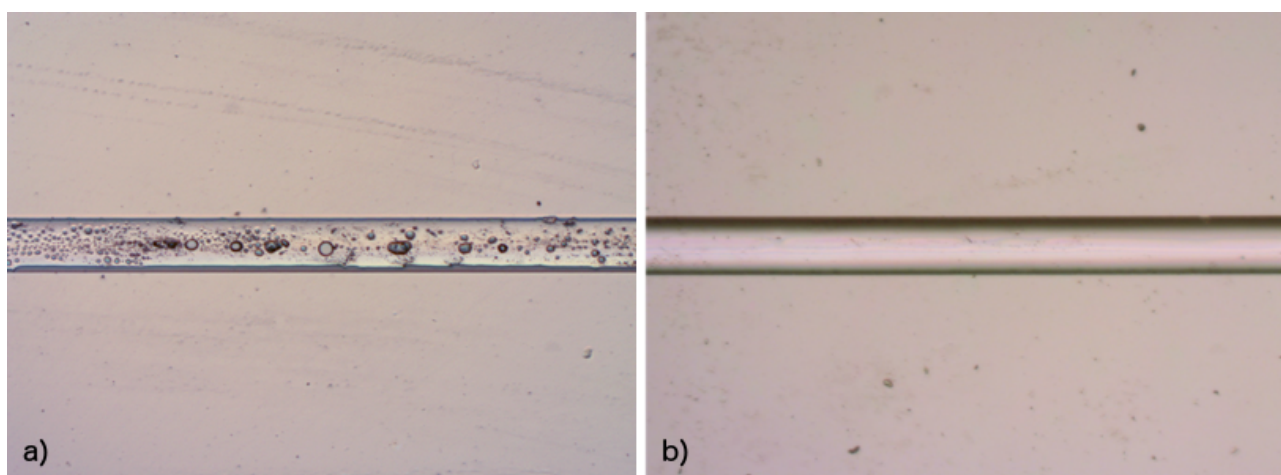

*Additional Fig. 2 a) Microfluidic channel 200 μm wide in full PDMS thin layer. The bubbles visible are immersion oil seeping through the PDMS layer. b) Microfluidic channel in the hybrid layer after usage with immersion oil. No bubble visible.*

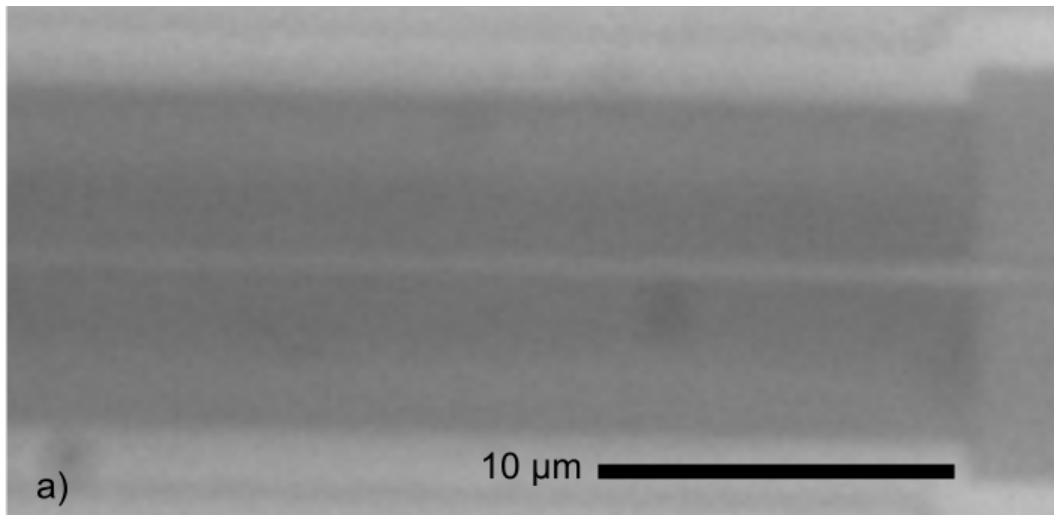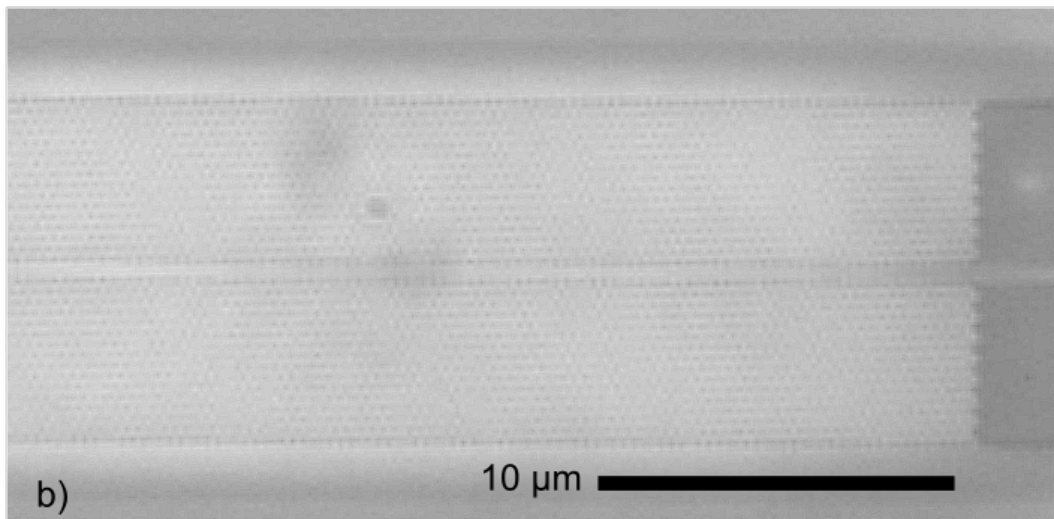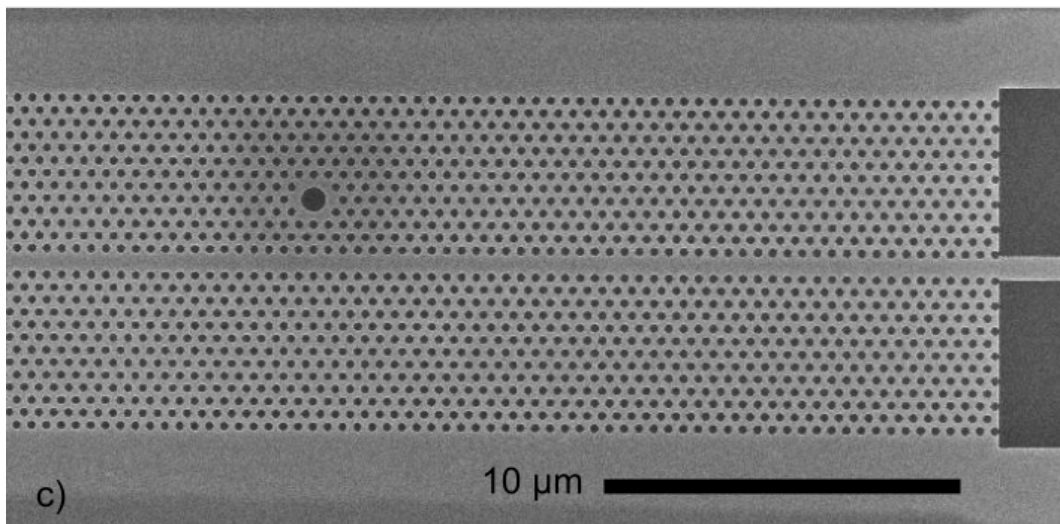

*Additional Fig. 3 a) Picture of a silicon photonic crystal membrane taken through a full PDMS microfluidic layer 150  $\mu\text{m}$  thick b) Same type of photonic crystal imaged through the hybrid PDMS/glass microfluidics. The illumination between the two pictures is unchanged. c) SEM image of the photonic crystal. Illumination wavelength for the microscope pictures at 520 nm.*

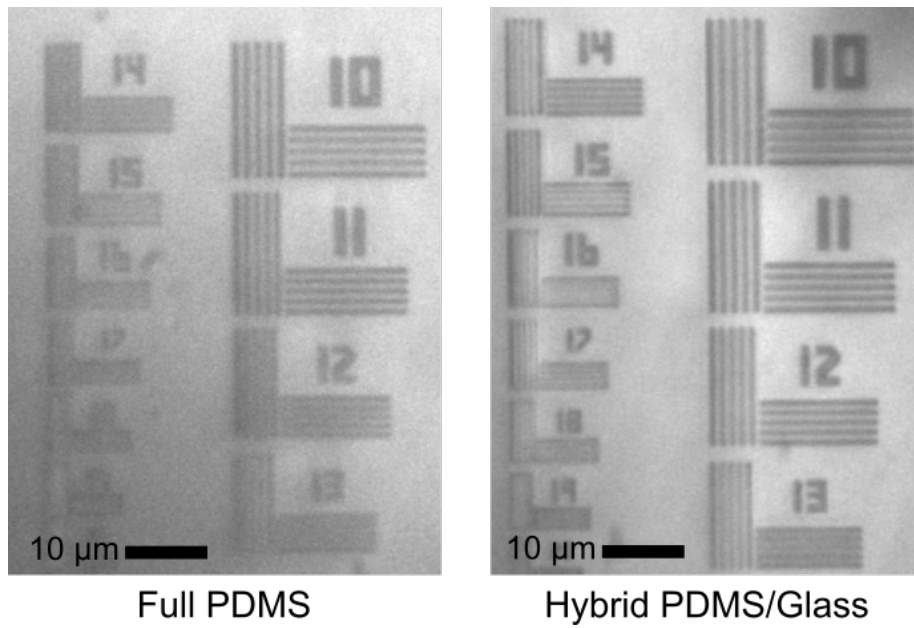

*Additional Fig. 4 Images from the adapted NBS1010A microscopy resolution targets. Cut-off frequency for the full PDMS layer is at 1400 lines/mm whereas the cut-off is at 2200 lines/mm for the hybrid microfluidics. Illumination wavelength is 520 nm.*
